# Supplementary material for: Retinoic Acid Specifically Enhances Embryonic Stem Cell Metastate Marked by Zscan4
Source: PubMed Central journal article supplement (PMC4740454; doi:10.1371/journal.pone.0147683), 2016-02-03
Supplement: pone.0147683.s003.pdf [file pone.0147683.s003.pdf]

| Probe ID    | Mean(Zscan4_RA_Em+) | Mean(Zscan4_RA_Em <sup>-</sup> ) | Symbol        | FC   |
|-------------|---------------------|----------------------------------|---------------|------|
| Z00034256-1 | 5,5253              | 3,70341                          | Zscan4        | 66,4 |
| Z00034921-1 | 5,0004              | 3,2496                           | Tcstv3        | 56,3 |
| Z00060442-1 | 5,2807              | 3,5417                           | LOC665446     | 54,8 |
| Z00052514-1 | 4,6523              | 2,9733                           | Tcstv1        | 47,8 |
| Z00072377-1 | 4,8702              | 3,25761                          | EG226955      | 41,0 |
| Z00009978-1 | 4,3346              | 2,7742                           | Tmem92        | 36,3 |
| Z00025583-1 | 3,8719              | 2,3317                           | Arg2          | 34,7 |
| Z00010132-1 | 4,959               | 3,47581                          | Eif1a         | 30,4 |
| Z00071195-1 | 4,6089              | 3,1462                           | LOC432715     | 29,0 |
| Z00060987-1 | 4,9258              | 3,47641                          | LOC636711     | 28,1 |
| Z00054501-1 | 3,7799              | 2,331                            | Gm12794       | 28,1 |
| Z00054672-1 | 4,1987              | 2,75981                          | Gm1070        | 27,5 |
| Z00026479-1 | 5,4245              | 4,0164                           | Gm4340        | 25,6 |
| Z00031385-1 | 4,3201              | 2,9605                           | BC061212      | 22,9 |
| Z00070845-1 | 5,1497              | 3,7936                           | EG667568      | 22,7 |
| Z00055635-1 | 4,3574              | 3,031                            | LOC385201     | 21,2 |
| Z00010296-1 | 4,0298              | 2,7097                           | LOC434660     | 20,9 |
| Z00059517-1 | 4,0152              | 2,7454                           | LOC673293     | 18,6 |
| Z00070806-1 | 4,4783              | 3,2188                           | 1700001F09Rik | 18,2 |
| Z00054286-1 | 3,9061              | 2,64991                          | Myo3a         | 18,0 |
| Z00064311-1 | 3,6907              | 2,43741                          | LOC432590     | 17,9 |
| Z00030830-1 | 4,1826              | 2,9338                           | AF067063      | 17,7 |
| Z00010834-1 | 3,9168              | 2,66811                          | A530040E14Rik | 17,7 |
| Z00072401-1 | 3,2273              | 1,9828                           | EG668777      | 17,6 |
| Z00026547-1 | 3,2094              | 2,00891                          | A830029E22Rik | 15,9 |
| Z00053189-1 | 3,7657              | 2,57231                          | Lgals4        | 15,6 |
| Z00024834-1 | 4,3971              | 3,2039                           | Ly6h          | 15,6 |
| Z00038869-1 | 3,44                | 2,25641                          | LOC433231     | 15,3 |
| Z00027203-1 | 3,4953              | 2,32391                          | LOC240895     | 14,8 |
| Z00033463-1 | 4,6287              | 3,4666                           | Hmga2-ps1     | 14,5 |
| Z00014650-1 | 3,9762              | 2,82431                          | RP23-289L21.1 | 14,2 |
| Z00022546-1 | 4,7973              | 3,6567                           | Rfxap         | 13,8 |
| Z00025315-1 | 5,0109              | 3,8785                           | Pif1          | 13,6 |
| Z00000661-1 | 3,3069              | 2,1912                           | Mgll          | 13,1 |
| Z00050009-1 | 4,0282              | 2,91491                          | 1700066J24Rik | 13,0 |
| Z00056063-1 | 4,1211              | 3,0164                           | EG666169      | 12,7 |
| Z00032628-1 | 3,7256              | 2,62111                          | Cdh20         | 12,7 |
| Z00057246-1 | 4,0682              | 2,977                            | LOC381535     | 12,3 |
| Z00060458-1 | 3,9922              | 2,90641                          | Gm428         | 12,2 |
| Z00026897-1 | 4,2001              | 3,1296                           | 2310065F04Rik | 11,8 |
| Z00070299-1 | 5,1438              | 4,08731                          | 3930401B19Rik | 11,4 |
| Z00058452-1 | 3,8351              | 2,79401                          | LOC669397     | 11,0 |
| Z00030644-1 | 3,4158              | 2,38371                          | C130092O11Rik | 10,8 |
| Z00056563-1 | 3,7156              | 2,7147                           | Cand1         | 10,0 |
| Z00054259-1 | 3,4261              | 2,43691                          | Lmx1a         | 9,8  |
| Z00012520-1 | 4,8328              | 3,87821                          | Whsc2         | 9,0  |
| Z00023692-1 | 3,8189              | 2,8669                           | Cpb2          | 9,0  |
| Z00059946-1 | 3,9393              | 2,9931                           | Gm854         | 8,8  |
| Z00070929-1 | 2,7187              | 1,7746                           | Gm257         | 8,8  |

|             |        |                        |     |
|-------------|--------|------------------------|-----|
| Z00037504-1 | 3,8365 | 2,8953 Hspa1a          | 8,7 |
| Z00058951-1 | 4,0608 | 3,1257 BC080695        | 8,6 |
| Z00052446-1 | 3,6852 | 2,75641 Lonrf3         | 8,5 |
| Z00031258-1 | 3,3013 | 2,3737 EG666099        | 8,5 |
| Z00054412-1 | 3,3925 | 2,4959 1810062G17Rik   | 7,9 |
| Z00031058-1 | 3,5221 | 2,63011 D5Erd577e      | 7,8 |
| Z00067545-1 | 4,2148 | 3,3378 LOC627530       | 7,5 |
| Z00032758-1 | 3,296  | 2,44451 LOC226030      | 7,1 |
| Z00072723-1 | 3,3306 | 2,481 LOC631120        | 7,1 |
| Z00073053-1 | 4,5929 | 3,7467 Drr2            | 7,0 |
| Z00059740-1 | 3,0357 | 2,18961 LOC673230      | 7,0 |
| Z00072895-1 | 3,1366 | 2,2952 LOC625360       | 6,9 |
| Z00030445-1 | 4,0076 | 3,16951 OTTMUSG0010537 | 6,9 |
| Z00072933-1 | 3,2963 | 2,46561 LOC673656      | 6,8 |
| Z00047227-1 | 3,4804 | 2,65 Zfp809            | 6,8 |
| Z00020544-1 | 3,3661 | 2,578 Cacna1s          | 6,1 |
| Z00023243-1 | 4,1061 | 3,32741 Ercc4          | 6,0 |
| Z00034203-1 | 3,3613 | 2,58951 4631416L12Rik  | 5,9 |
| Z00060019-1 | 3,9836 | 3,215 LOC673289        | 5,9 |
| Z00060430-1 | 3,1281 | 2,37121 Ankrd22        | 5,7 |
| Z00066847-1 | 4,1458 | 3,401 LOC619649        | 5,6 |
| Z00056514-1 | 3,0214 | 2,28181 LOC215996      | 5,5 |
| Z00026871-1 | 3,2971 | 2,55791 B020004J07Rik  | 5,5 |
| Z00010220-1 | 2,4878 | 1,7497 B020006M18Rik   | 5,5 |
| Z00058056-1 | 4,1593 | 3,42241 EG624262       | 5,5 |
| Z00053533-1 | 3,9962 | 3,2657 Hist1h4i        | 5,4 |
| Z00009042-1 | 4,036  | 3,30671 Fbxo15         | 5,4 |
| Z00030855-1 | 3,1697 | 2,4464 LOC545920       | 5,3 |
| Z00027180-1 | 3,2687 | 2,56421 Zfp352         | 5,1 |
| Z00070787-1 | 3,3631 | 2,6655 EG668730        | 5,0 |
| Z00009785-1 | 4,211  | 3,5136 Zfp296          | 5,0 |
| Z00017558-1 | 2,9508 | 2,2535 Prkch           | 5,0 |
| Z00022677-1 | 3,4246 | 2,72861 Ccl3           | 5,0 |
| Z00072872-1 | 3,4432 | 2,7578 Bbc3            | 4,8 |
| Z00064837-1 | 3,1918 | 2,5095 Glrx2           | 4,8 |
| Z00057090-1 | 4,545  | 3,864 D030070L09Rik    | 4,8 |
| Z00058806-1 | 4,8592 | 4,17981 EG434050       | 4,8 |
| Z00059951-1 | 3,1707 | 2,4985 LOC434179       | 4,7 |
| Z00021695-1 | 3,7753 | 3,1052 Slc27a2         | 4,7 |
| Z00031419-1 | 3,3065 | 2,6373 C330013J21Rik   | 4,7 |
| Z00016144-1 | 3,5578 | 2,8945 Arid4a          | 4,6 |
| Z00052427-1 | 2,8283 | 2,1753 Stox1           | 4,5 |
| Z00072669-1 | 3,4941 | 2,8428 LOC675962       | 4,5 |
| Z00043376-1 | 4,6454 | 4,0058 Avpi1           | 4,4 |
| Z00070167-1 | 3,6342 | 3,0073 1200016E24Rik   | 4,2 |
| Z00057680-1 | 3,2262 | 2,6018 LOC381936       | 4,2 |
| Z00030929-1 | 3,5962 | 2,9719 Rex2            | 4,2 |
| Z00024913-1 | 3,9565 | 3,34101 Jam2           | 4,1 |
| Z00010394-1 | 4,4632 | 3,85191 Tsen2          | 4,1 |
| Z00050174-1 | 3,0756 | 2,46561 Tbc1d12        | 4,1 |

|             |        |                       |     |
|-------------|--------|-----------------------|-----|
| Z00071813-1 | 2,573  | 1,9662 LOC193079      | 4,0 |
| Z00058060-1 | 3,4599 | 2,85471 Snip1         | 4,0 |
| Z00012313-1 | 3,6579 | 3,0601 2410017P07Rik  | 4,0 |
| Z00022630-1 | 3,0256 | 2,43211 Dub2          | 3,9 |
| Z00034227-1 | 3,1045 | 2,53911 EG665756      | 3,7 |
| Z00071997-1 | 2,9465 | 2,38351 LOC229571     | 3,7 |
| Z00031864-1 | 2,949  | 2,38751 LOC545238     | 3,6 |
| Z00061068-1 | 2,6306 | 2,071 4930488B22Rik   | 3,6 |
| Z00072639-1 | 3,563  | 3,00441 5830484A20Rik | 3,6 |
| Z00025963-1 | 2,8235 | 2,2731 Serpina5       | 3,6 |
| Z00004477-1 | 3,2955 | 2,749 Pthr1           | 3,5 |
| Z00071412-1 | 3,2302 | 2,68481 Tdpoz5        | 3,5 |
| Z00026921-1 | 2,9463 | 2,40431 EG620899      | 3,5 |
| Z00030763-1 | 4,0011 | 3,4597 BC003993       | 3,5 |
| Z00072792-1 | 3,8088 | 3,27261 LOC677603     | 3,4 |
| Z00020938-1 | 3,672  | 3,1387 Scamp1         | 3,4 |
| Z00024554-1 | 2,5009 | 1,9855 Chrn4          | 3,3 |
| Z00043435-1 | 3,9688 | 3,4572 Phf11          | 3,2 |
| Z00038178-1 | 3,7741 | 3,26771 1700052K11Rik | 3,2 |
| Z00073573-1 | 2,9905 | 2,4888 D3Ert731e      | 3,2 |
| Z00020173-1 | 3,0655 | 2,5656 Adcy5          | 3,2 |
| Z00071451-1 | 4,6067 | 4,11191 LOC673503     | 3,1 |
| Z00070538-1 | 4,6619 | 4,16721 Al553587      | 3,1 |
| Z00052608-1 | 3,5467 | 3,0532 Dcbld1         | 3,1 |
| Z00063525-1 | 2,8581 | 2,37211 LOC623033     | 3,1 |
| Z00023684-1 | 3,1333 | 2,6498 Bdnf           | 3,0 |
| Z00035296-1 | 2,6883 | 2,20601 Hdc           | 3,0 |
| Z00041617-1 | 2,9054 | 2,4233 4932442E05Rik  | 3,0 |
| Z00064347-1 | 2,8518 | 2,37251 BC038328      | 3,0 |
